# Supplementary material for: Monitoring of microbial dynamics in a drinking water distribution system using the culture-free, user-friendly, MYcrobiota platform
Source: PubMed Central journal article supplement (PMC6170421; doi:10.1038/s41598-018-32987-x), 2018-10-03
Supplement: 41598_2018_32987_MOESM1_ESM.pdf [file 41598_2018_32987_MOESM1_ESM.pdf]

**Monitoring of microbial dynamics in a drinking water distribution system using the culture-free, user-friendly, MYcrobiota platform.**

Stefan A. Boers, Emmanuelle I. Prest, Maja Taučer-Kapteijn, Aleksandra Knezev, Peter G. Schaap,  
John P. Hays, Ruud Jansen

**Supplementary Table 1. Sequence characteristics of all thirty drinking water samples processed in triplicate during this study.**

| Description                                                                                | MYcrobiota results*        |
|--------------------------------------------------------------------------------------------|----------------------------|
| # raw sequence reads (range)                                                               | 131,742 (14,326 – 213,990) |
| # raw sequence reads used for analysis                                                     | 10,000                     |
| - % removed sequence reads that does not match 100% with primers                           | 13.7 (± 0.5)               |
| - % removed sequence reads that are shorter than 200 and longer than 300 bases             | 0.8 (± 0.5)                |
| - % removed sequence reads containing ambiguous bases (N)                                  | 2.5 (± 0.2)                |
| - % removed sequence reads that did not align to the SILVA reference alignment release 123 | 0.2 (± 0.1)                |
| - % removed sequence reads that were identified as chimeric sequences                      | 3.0 (± 1.5)                |
| - % removed sequence reads that were classified as non-prokaryotic OTUs                    | 0.1 (± 0.2)                |
| # sequence reads clustered into OTUs at 97% similarity (range)                             | 7,938 (7,257 – 8,307)      |
| # observed OTUs at 97% similarity                                                          | 69 (± 16)                  |
| % sequence reads clustered into the <i>Campylobacter</i> (IC) OTU**                        | 7.7 (± 1.8)                |

\*: All data represent median values obtained from 30 drinking water samples that were processed in triplicate using MYcrobiota. The standard deviation is given in parentheses, unless stated otherwise. \*\*: Prior to micPCR amplification, *Campylobacter* DNA was added as internal calibrator (IC) in such a concentration that each drinking water sample contained approximately 10% of the IC 16S rRNA gene copies. The IC is used to calculate a correction factor that in turn is used to convert the obtained sequence reads per OTU to 16S rRNA gene copies per OTU.

**Supplementary Table 2. Comparison of microbial dynamics in time and distance over the studied DWDS based on conventional methods and MYcrobiota.**

| Month / location | Temp. (°C) | HPC (CFU/mL) | bATP (ng/L) | FCM (intact bacterial cells/mL) | MYcrobiota (16S rRNA gene copies/mL) |
|------------------|------------|--------------|-------------|---------------------------------|--------------------------------------|
| <b>July</b>      |            |              |             |                                 |                                      |
| Location A       | 18.5       | <25          | < 2.0       | 33,400                          | 5,292                                |
| Location B       | 18.7       | <25          | < 2.0       | 8,700                           | 3,630                                |
| Location C       | 17.9       | 328          | 2.6         | 57,000                          | 12,670                               |
| Location D       | 17.0       | 92           | 4.8         | 83,200                          | 11,877                               |
| Location E       | 17.4       | 33           | 4.8         | 92,300                          | 10,227                               |
| Location F       | 17.8       | <25          | 3.9         | 94,200                          | 19,282                               |
| <b>August</b>    |            |              |             |                                 |                                      |
| Location A       | 19.7       | <25          | < 2.0       | 31,200                          | 7,678                                |
| Location B       | 20.0       | <25          | < 2.0       | 5,800                           | 1,764                                |
| Location C       | 19.4       | 37           | < 2.0       | 55,900                          | 10,357                               |
| Location D       | 18.7       | 39           | 3.7         | 73,800                          | 9,466                                |
| Location E       | 18.8       | 92           | < 2.0       | 66,600                          | 11,513                               |
| Location F       | 19.5       | 46           | < 2.0       | 89,400                          | 10,470                               |
| <b>September</b> |            |              |             |                                 |                                      |
| Location A       | 20.9       | <25          | < 2.0       | 49,500                          | 9,954                                |
| Location B       | 20.9       | <25          | 2.5         | 54,200                          | 17,092                               |
| Location C       | 20.2       | <25          | 3.5         | 41,000                          | 15,715                               |
| Location D       | 19.4       | 28           | 3.3         | 70,100                          | 13,393                               |
| Location E       | 19.6       | <25          | 3.0         | 80,400                          | 21,141                               |
| Location F       | 20.1       | 29           | 4.3         | 76,800                          | 14,387                               |
| <b>October</b>   |            |              |             |                                 |                                      |
| Location A       | 15.0       | <25          | < 2.0       | 58,800                          | 18,946                               |
| Location B       | 15.2       | <25          | < 2.0       | 900                             | 2,566                                |
| Location C       | 15.1       | <25          | 3.3         | 37,100                          | 9,393                                |
| Location D       | 16.0       | <25          | 4.1         | 39,600                          | 14,110                               |
| Location E       | 16.1       | <25          | < 2.0       | 39,200                          | 6,019                                |
| Location F       | 16.6       | <25          | 2.0         | 38,000                          | 8,526                                |
| <b>November</b>  |            |              |             |                                 |                                      |
| Location A       | 8.7        | <25          | < 2.0       | 54,200                          | 6,383                                |
| Location B       | 10.0       | <25          | < 2.0       | 17,200                          | 1,400                                |
| Location C       | 9.9        | 25           | 2.2         | 12,900                          | 5,445                                |
| Location D       | 10.6       | <25          | < 2.0       | 26,300                          | 5,784                                |
| Location E       | 10.7       | <25          | < 2.0       | 29,800                          | 3,919                                |
| Location F       | 10.9       | <25          | < 2.0       | 28,000                          | 5,787                                |

Drinking water samples were taken at six consecutive locations within the DWDS (A - pump station, B - storage reservoir, C and D - transport pipelines, E - distribution pipeline, F - tap water) over a 5-month period. HPC – heterotrophic plate counts, bATP – bacterial adenosine-triphosphate measurement, FCM – flow cytometry.
